# Supplementary material for: OptRAM: In-silico strain design via integrative regulatory-metabolic network modeling
Source: PubMed Central journal article supplement (PMC6426274; doi:10.1371/journal.pcbi.1006835), 2019-03-08
Supplement: pcbi.1006835.s002.pdf [file pcbi.1006835.s002.pdf]

S2-Table. The plasmid and primers used in the yeast experiment

| Plasmid used in this study |                                                    |                          |
|----------------------------|----------------------------------------------------|--------------------------|
| Plasmid                    | Description                                        | Reference                |
| HO                         | Kan MX4 resource                                   |                          |
| Cas9-NAT                   | Cas9 protein expression plasmid                    | Zhang <i>et al.</i> 2014 |
| pRS42H-gRNA                | gRNA expression plasmid                            | This study               |
| pRS42H-gRNA_MDH2           | gRNA expression plasmid targeting <i>MDH2</i> gene | This study               |
| pRS42H-gRNA_COX4           | gRNA expression plasmid targeting <i>COX4</i> gene | This study               |

| Primers used in this study |                                                                        |
|----------------------------|------------------------------------------------------------------------|
| Primer                     | Sequence(5'→3')                                                        |
| BDH1-F                     | <u>ATGAGAGCTTTGGCATATTTCAAGAAGGGTGATATTC</u> ACTGACATGGAGGCCCAAGAATAC  |
| BDH1-R                     | TTACTTCATTTACCGTGATTGTTAGGCGTCAATAGAATCCAGTATAGCGACCAGCATT             |
| gRNA-MDH2-F:               | <u>GATCAGTGGCTCGACACGGAAATG</u>                                        |
| gRNA-MDH2-R:               | <u>AAACCATTTCCGTGTCGAGCCACT</u>                                        |
| gRNA-COX4-F:               | <u>GATCATCTTTCATGGTACCCTTCC</u>                                        |
| gRNA-COX4-R:               | <u>AAACGGAAGGGTACCATGAAAGAT</u>                                        |
| MDH2-donor-F               | TCAACGGTGTTACCGCCGACTTGTCTCATATAGACT <b>TAAC</b> CCATTTCCGTGTCGAGCCACT |
| MDH2-donor-R               | GCAAACAGTTCTCAATGCCACCTGCAGGAGAGTGGCTCGACACGGAAATGGG <b>TTAGTCTA</b>   |
| COX4 donor-F               | GGTATCGATGTTTTTCGACACCAAACCATTAGATTCG <b>TAAAGGAA</b> GGGTACCATGAAAGAT |
| COX4 donor-R               | ATAATCATCATAAGATTCAATGATGATCGGATCTTTCATGGTACCC <b>TTCCTTTACGAATC</b>   |

Note: The homologous sequence was characterized as underline, the introduced stop codon (TAA) was presented in bold characters.
