# Supplementary material for: OptRAM: In-silico strain design via integrative regulatory-metabolic network modeling
Source: PLoS Comput Biol. 2019 Mar 8;15(3):e1006835. doi: 10.1371/journal.pcbi.1006835 (PMC6426274; doi:10.1371/journal.pcbi.1006835)
Supplement: S4 Table — (XLSX) [file pcbi.1006835.s004.xlsx]

## Sheet: Sheet1
succinate
OptRAM predicted mutated genes	Gene/TF	Match with LASER	mutated genes by experiment
SDH3	Gene	√	SDH3
CAT8	TF	√	targets: DIC1,ICL1
ACE2	TF	√	targets:SER3
MET32	TF	√	targets:SDH1
HCM1	TF	√	targets:IDH1
MET4	TF	√	targets:IDH1
MET32	TF	√	targets:IDP1
HAP2	TF	√	targets:IDH1
HAP5	TF	√	MDH3
2,3-butanediol
OptRAM predicted mutated genes	Gene/TF	Match with LASER	mutated genes by experiment
ADH3	Gene	√	ADH3
GPD2	Gene	√	GPD2
STE12	TF	√	Targets: ADH1,ADH2,GPD1,GPD2,ALD6,BDH1
OAF1	TF	√	Targets: ADH1,ADH2
LEU3	TF	√	Targets:ADH2
ZAP1	TF	√	Targets:ADH4
ethanol
OptRAM predicted mutated genes	Gene/TF	Match with LASER	mutated genes by experiment
MDH2	Gene	√	MDH2
HCM1	TF	√	Target: ACC1,GLN1,TKL1
PDR3	TF	√	Target: ALD6
HAP2	TF	√	Target: GDH1,GLT1
OAF1	TF	√	Target: GLT1
